# Supplementary material for: Two Novel Multi-Functional Peptides from Meat and Visceral Mass of Marine Snail Neptunea arthritica cumingii and Their Activities In Vitro and In Vivo
Source: PubMed Central journal article supplement (PMC6315844; doi:10.3390/md16120473), 2018-11-27
Supplement: marinedrugs-16-00473-s001.pdf [file marinedrugs-16-00473-s001.pdf]

Figure S1

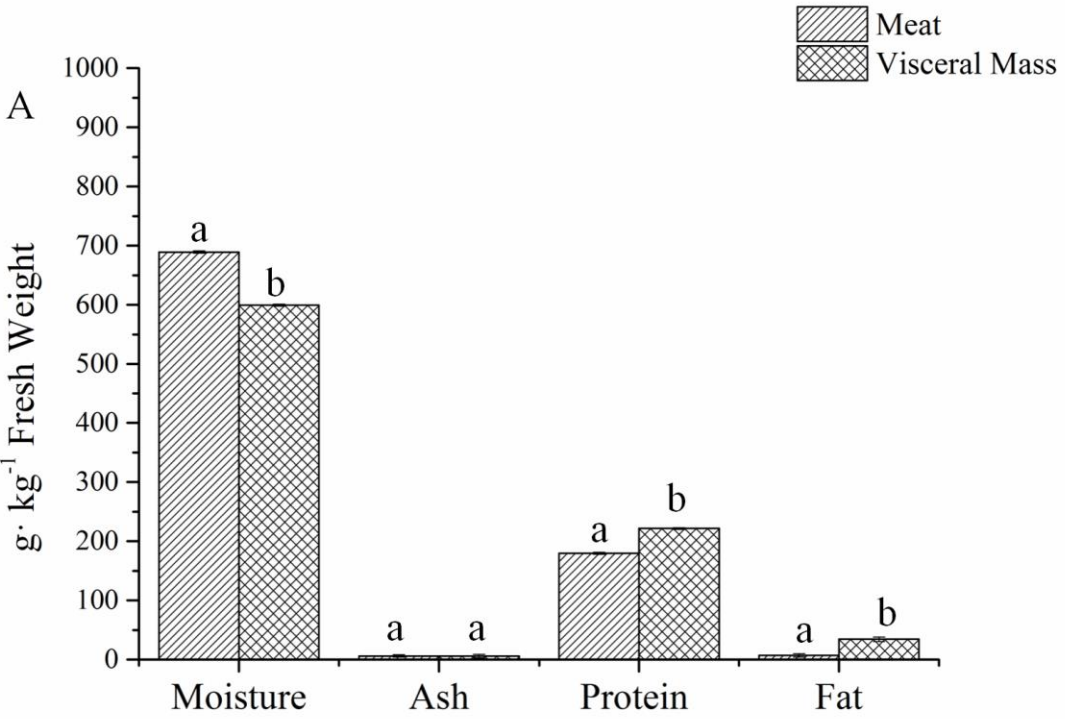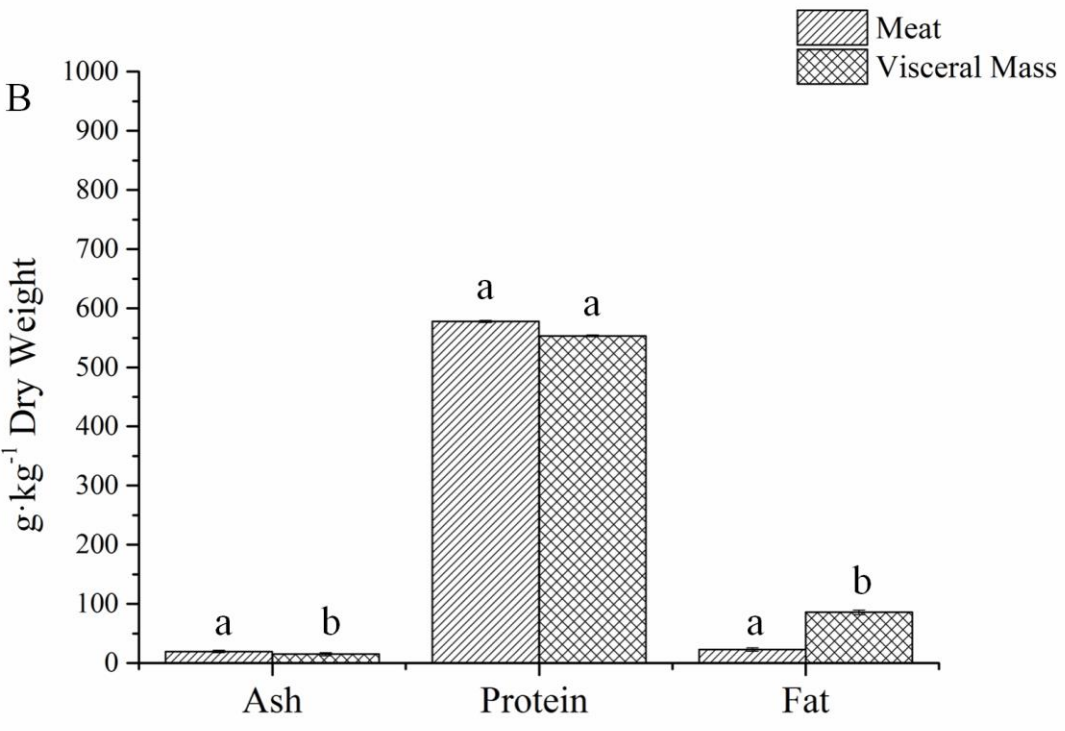

Figure S2

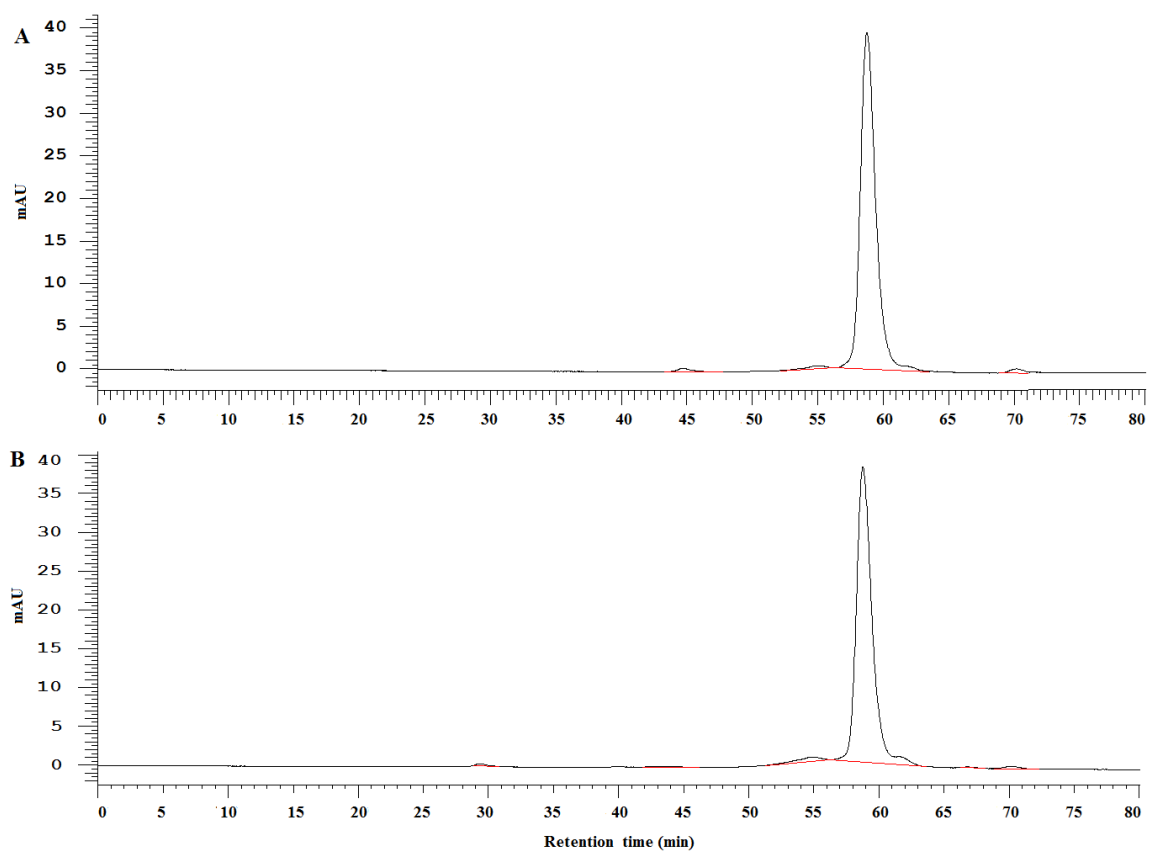

Figure S3

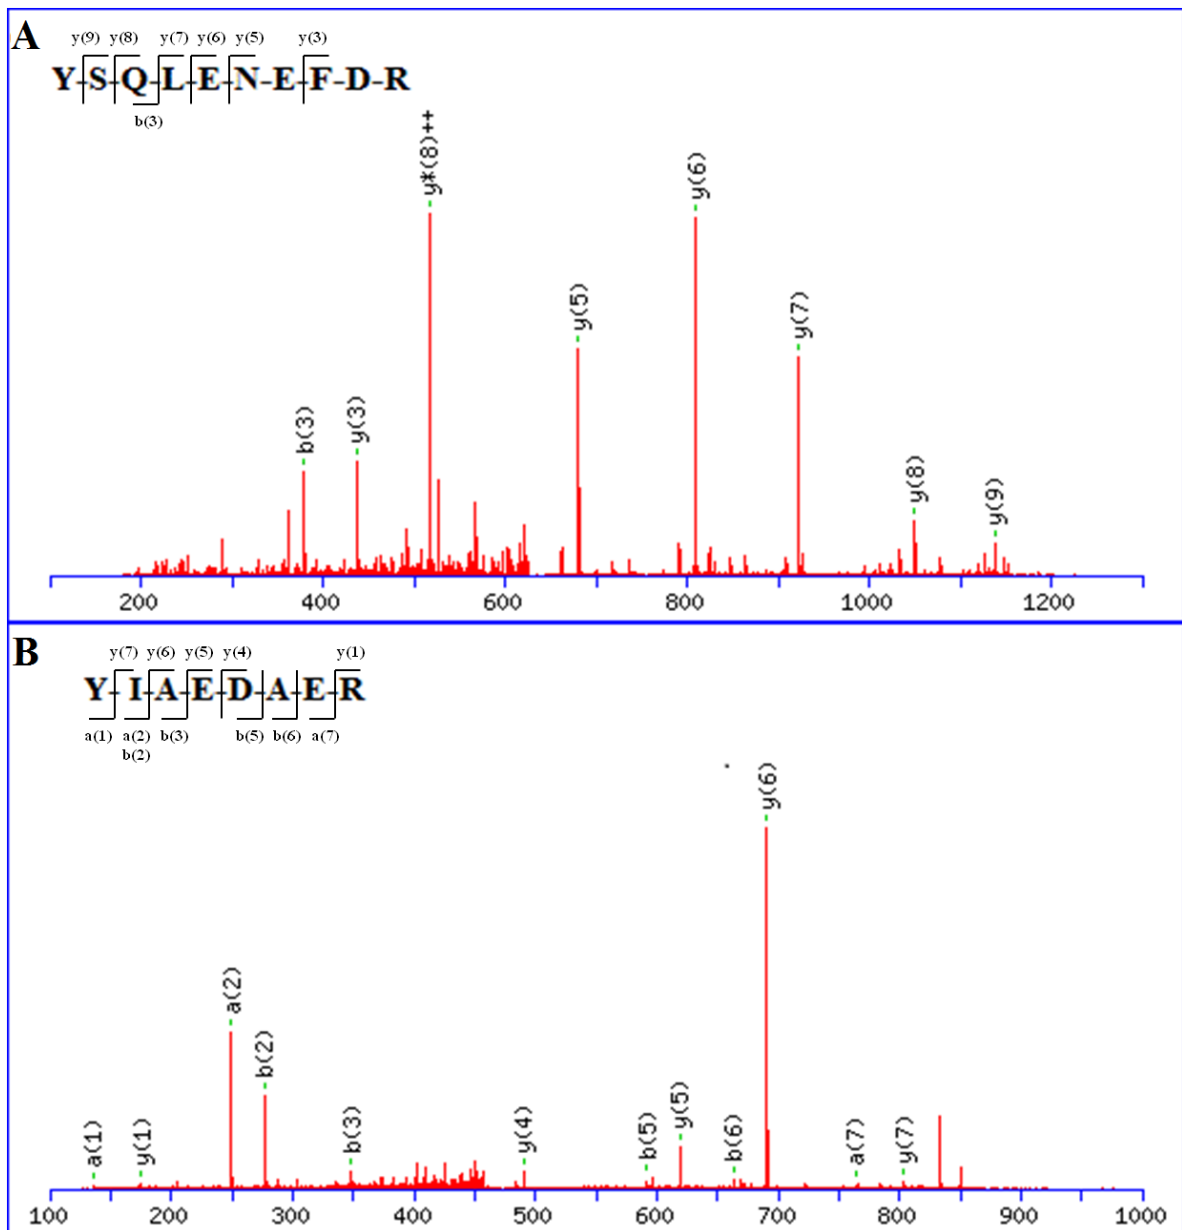

**Table S1 Pearson correlation coefficients (R) for various activity assays**

| Origin        | Group                        | Absorbance | DPPH  | ACE-inhibition | $\alpha$ -Amylase inhibition |
|---------------|------------------------------|------------|-------|----------------|------------------------------|
| Meat          | Absorbance                   | --         | 0.625 | 0.759          | 0.796                        |
|               | DPPH                         | 0.625      | --    | 0.859          | 0.766                        |
|               | ACE inhibition               | 0.759      | 0.859 | --             | 0.836                        |
|               | $\alpha$ -Amylase inhibition | 0.796      | 0.766 | 0.836          | --                           |
| Visceral Mass | Absorbance                   | --         | 0.815 | 0.627          | 0.877                        |
|               | DPPH                         | 0.815      | --    | 0.851          | 0.942                        |
|               | ACE inhibition               | 0.627      | 0.851 | --             | 0.812                        |
|               | $\alpha$ -Amylase inhibition | 0.877      | 0.942 | 0.812          | --                           |
